# Supplementary material for: A facile fabrication of electrodeposited luminescent MOF thin films for selective and recyclable sensing of nitroaromatic explosives
Source: Royal Society of Chemistry journal article supplement (doi:10.1039/c6an00840b), 2016-01-01
Supplement: c6an00840b1.pdf [file c6an00840b1.pdf]

## Supporting information

A facile electrodeposition fabricated luminescent MOF thin film for  
selective and recyclable sensing of nitroaromatic explosives

Feng Zhang, Yi Wang, Tianshu Chu, Zhongheng Wang, Wei Li and Yangyi Yang\*

School of Chemistry and Chemical Engineering & School of Materials Science and Engineering,  
Sun Yat-Sen University, Guangzhou 510275, P. R. China.

\*Corresponding Author: E-mail: cesyyy@mail.sysu.edu.cn; Tel: +86-20-84112977

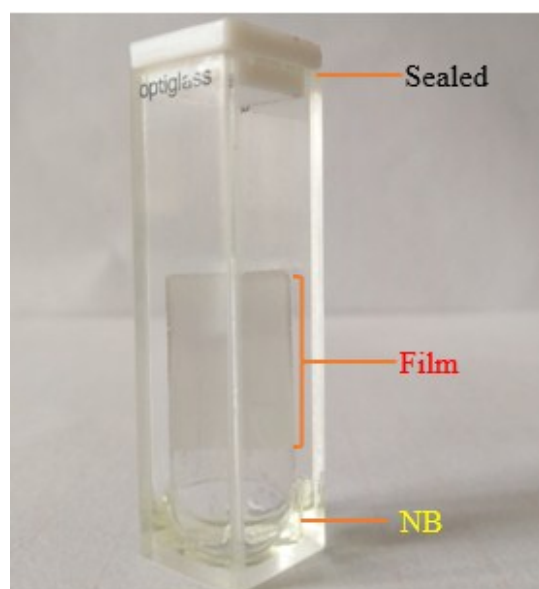

**Fig. S1** The experimental setup for the solid-gas detection nitrobenzene (NB) vapor.

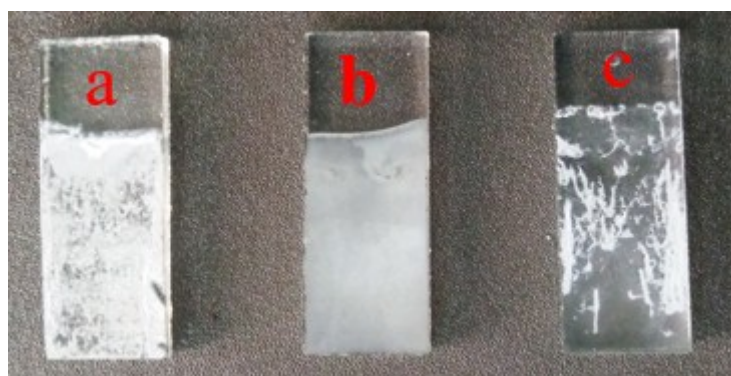

**Fig. S2** The as-prepared thin films with different supporting electrolyte: (a) KCl, (b)  $\text{NH}_4\text{NO}_3$ , (c) Tetrabutylammonium hexafluorophosphate.

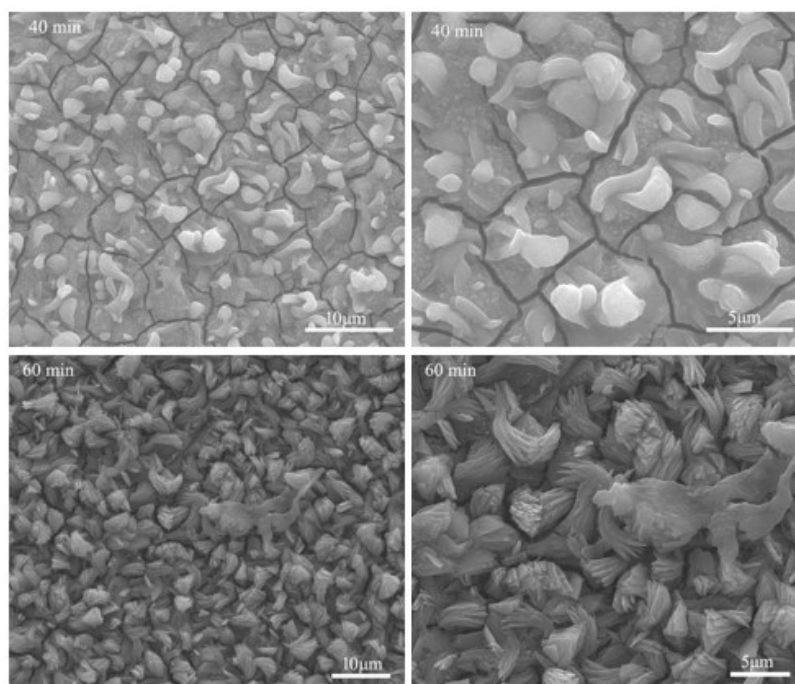

**Fig. S3** Top-down SEM micrographs of the films at the time of 40 min (up) and 60 min (down).

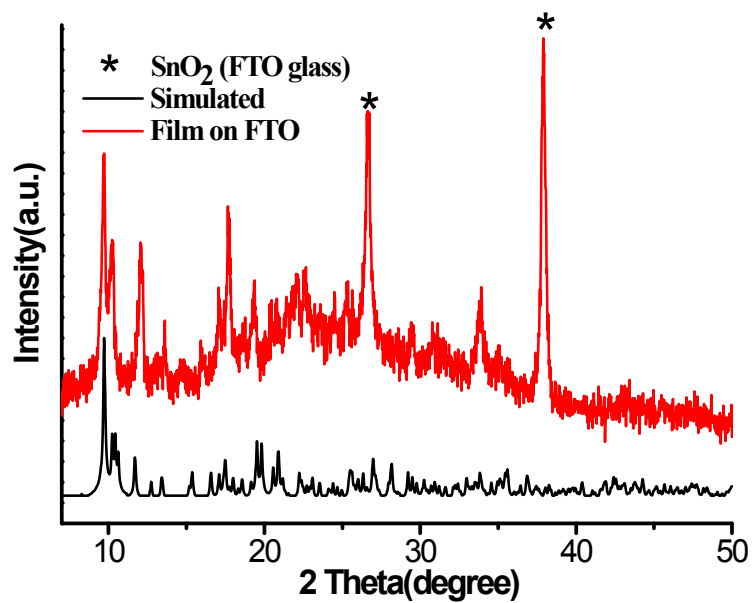

**Fig. S4** Powder X-ray diffraction patterns of electrodeposited thin film.

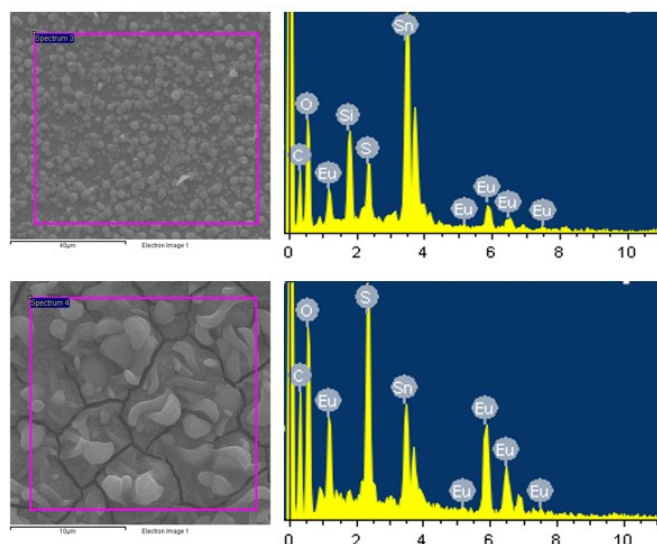

Fig. S5 The energy dispersive spectrometer (EDS) of Eu-TDC thin film.

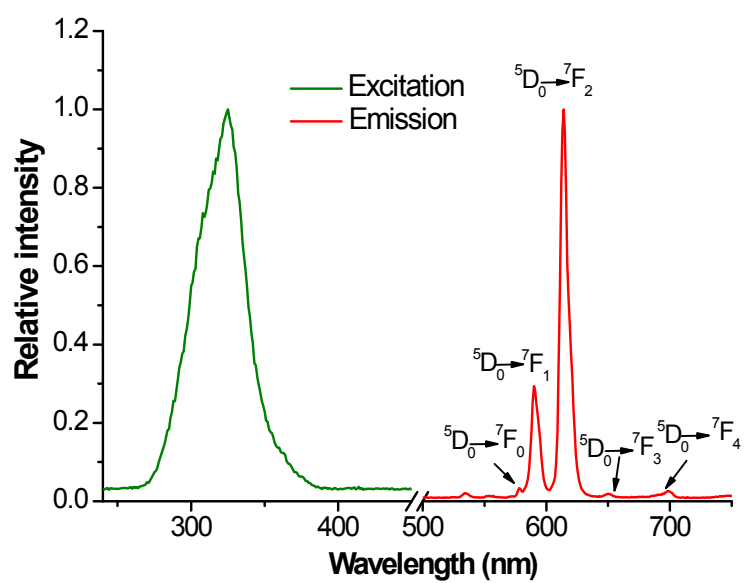

Fig. S6 Excitation and emission spectra of the Eu-TDC film in methanol.

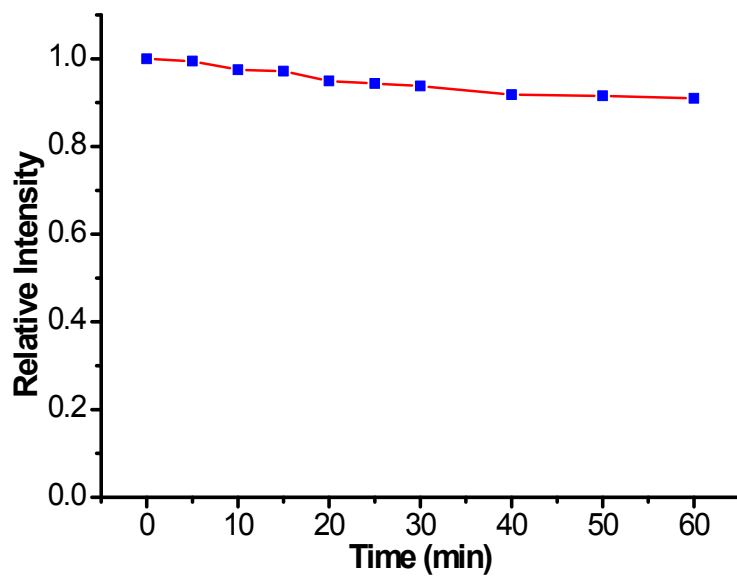

**Fig. S7** Time-dependent  ${}^5D_0 \rightarrow {}^7F_2$  normalized intensities of Eu-TDC film immersed in methanol.

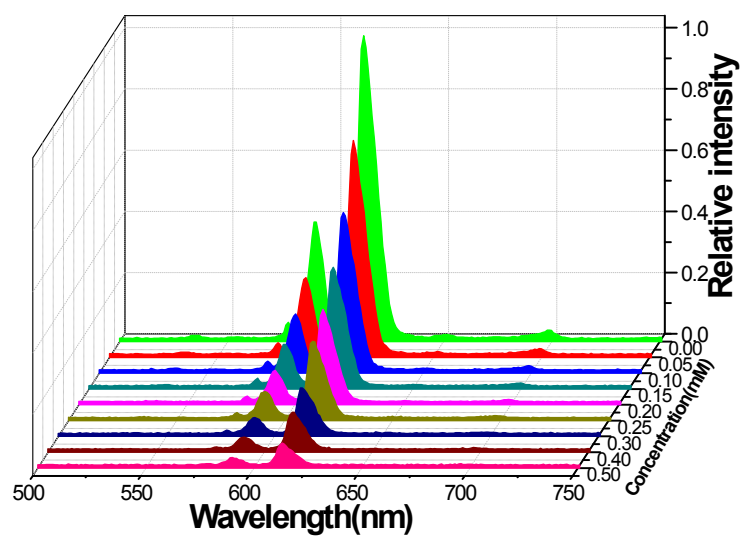

**Fig. S8** Concentration-dependent fluorescence quenching of Eu-TDC thin film upon the addition of different concentrations (mM) of 2,4-DNP in methanol.

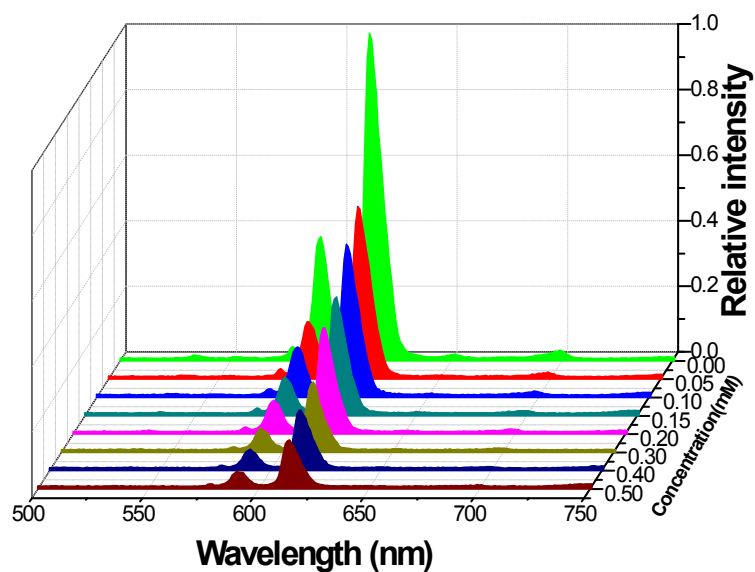

**Fig. S9** Concentration-dependent fluorescence quenching of Eu-TDC thin film upon the addition of different concentrations (mM) of 4-NP in methanol.

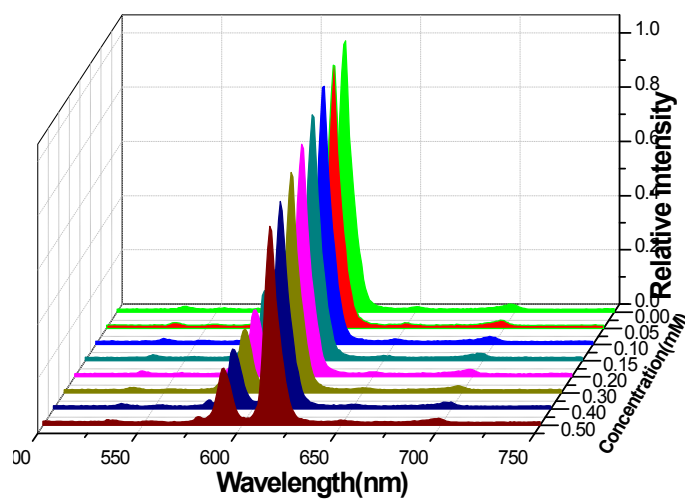

**Fig. S10** Concentration-dependent fluorescence quenching of Eu-TDC thin film upon the addition of different concentrations (mM) of TNT in methanol.

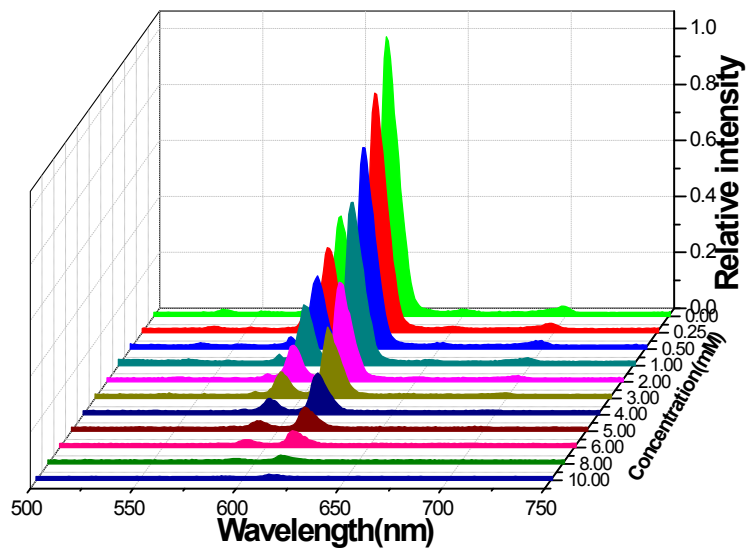

**Fig. S11** Concentration-dependent fluorescence quenching of Eu-TDC thin film upon the addition of different concentrations (mM) of 2,4-DNT in methanol.

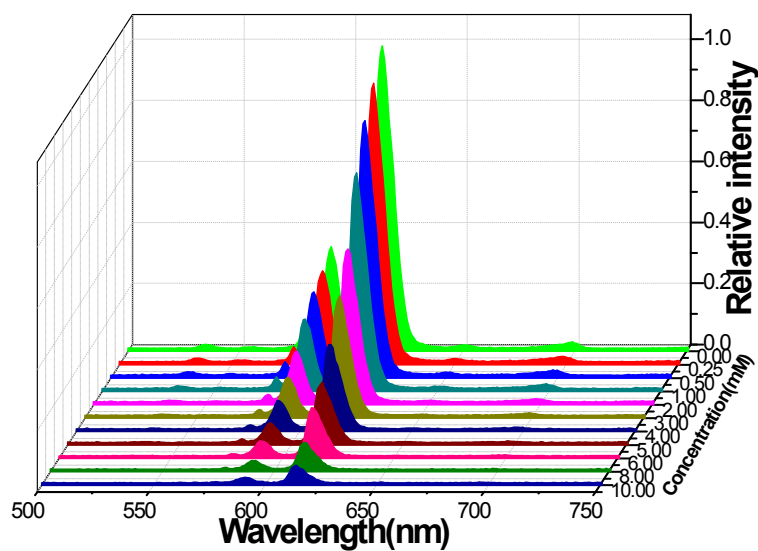

**Fig. S12** Concentration-dependent fluorescence quenching of Eu-TDC thin film upon the addition of different concentrations (mM) of 4-NT in methanol.

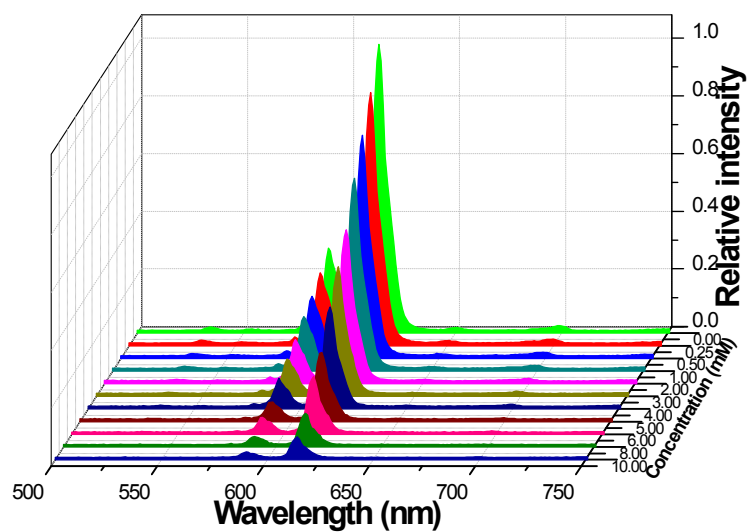

**Fig. S13** Concentration-dependent fluorescence quenching of Eu-TDC thin film upon the addition of different concentrations (mM) of NB in methanol.

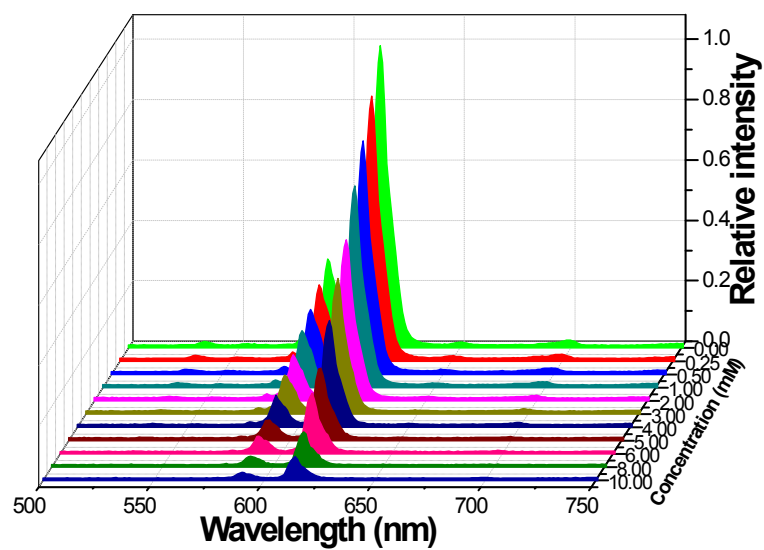

**Fig. S14** Concentration-dependent fluorescence quenching of Eu-TDC thin film upon the addition of different concentrations (mM) of NB in methanol.



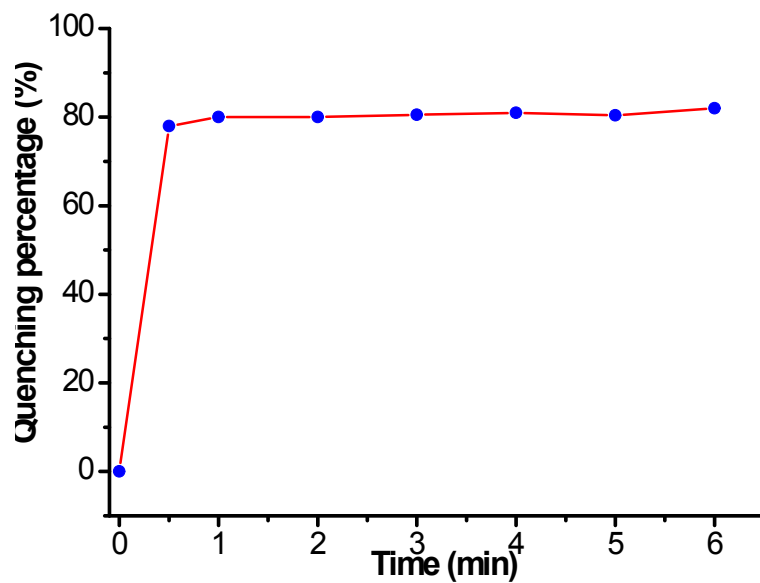

**Fig. S15** Time-dependent quenching percentage of Eu-TDC film immersed in 0.2 mM TNP solution of methanol.

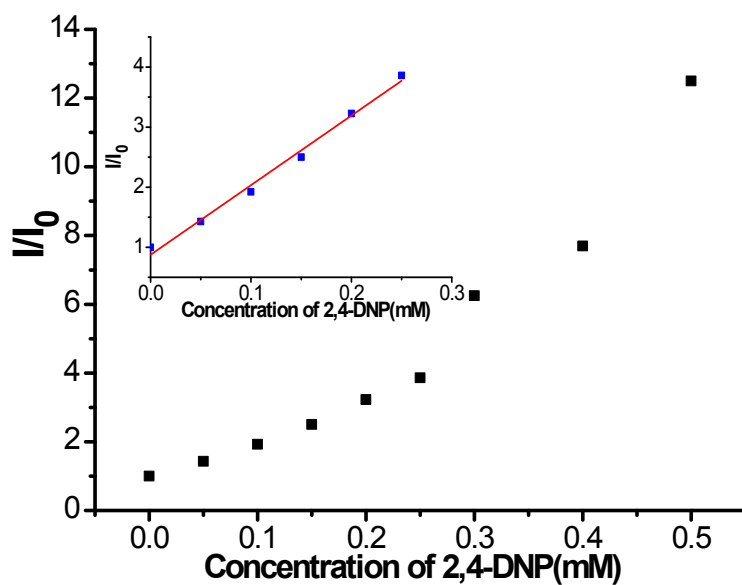

**Fig. S16** Stern-Volmer plot in response to 2,4-DNP. Inset shows the Stern-Volmer plot in the 2,4-DNP concentration range of 0~0.25 mM at room temperature.

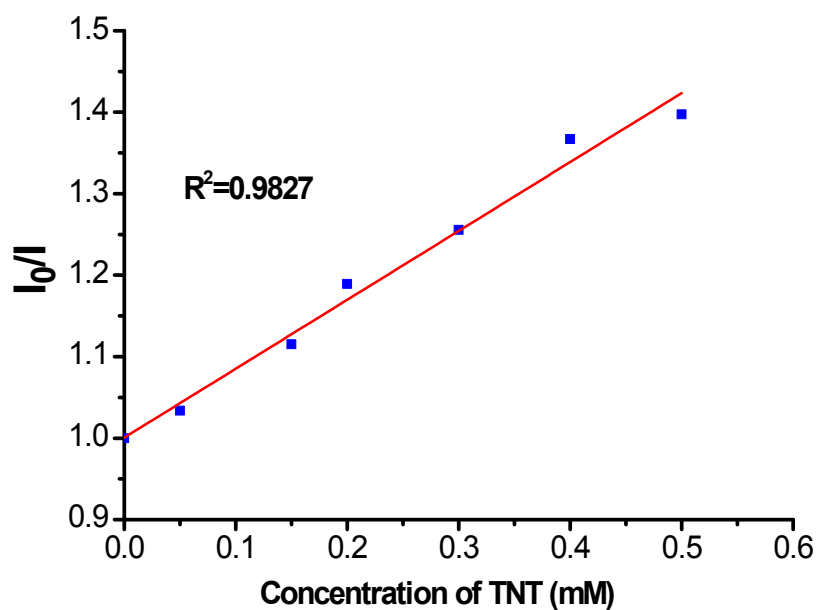

**Fig. S17** Stern-Volmer plot in the TNT concentration range of 0~0.5 mM at room temperature.

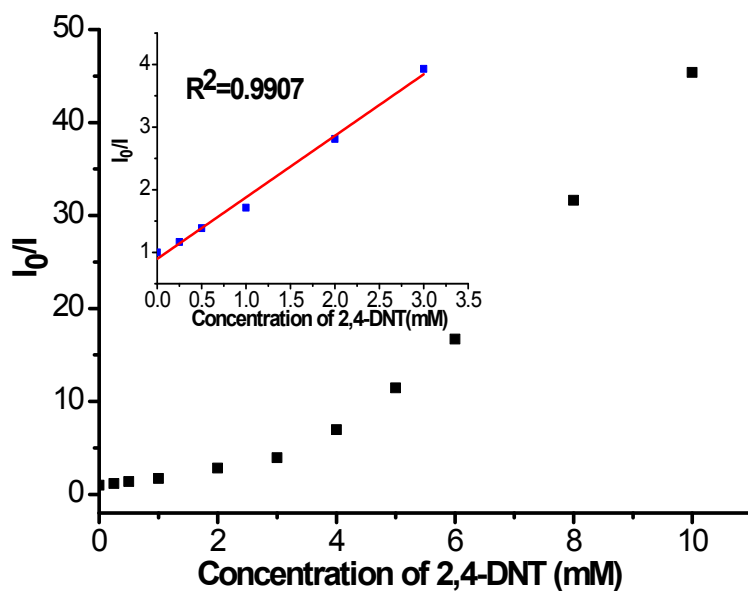

**Fig. S18** Stern-Volmer plot in response to 2,4-DNT. Inset shows the Stern-Volmer plot in the 2,4-DNP concentration range of 0~3.0 mM at room temperature.

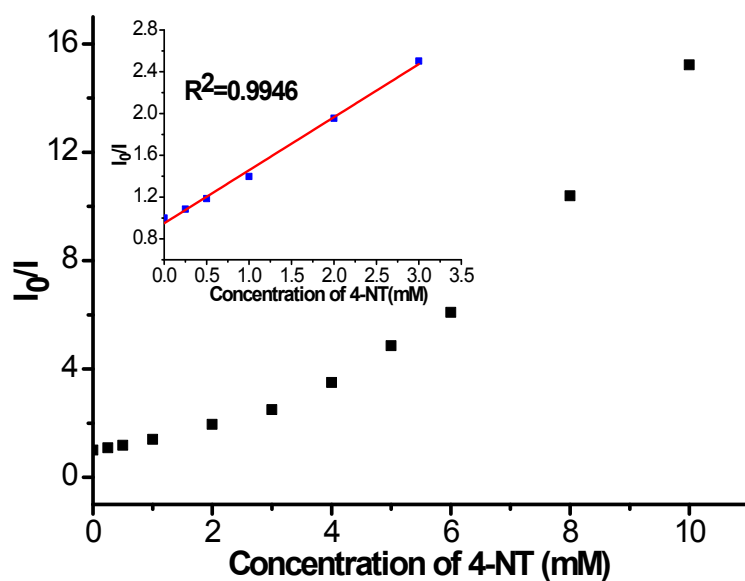

**Fig. S19** Stern-Volmer plot in response to 4-NT. Inset shows the Stern-Volmer plot in the 4-NT concentration range of 0~3.0 mM at room temperature.

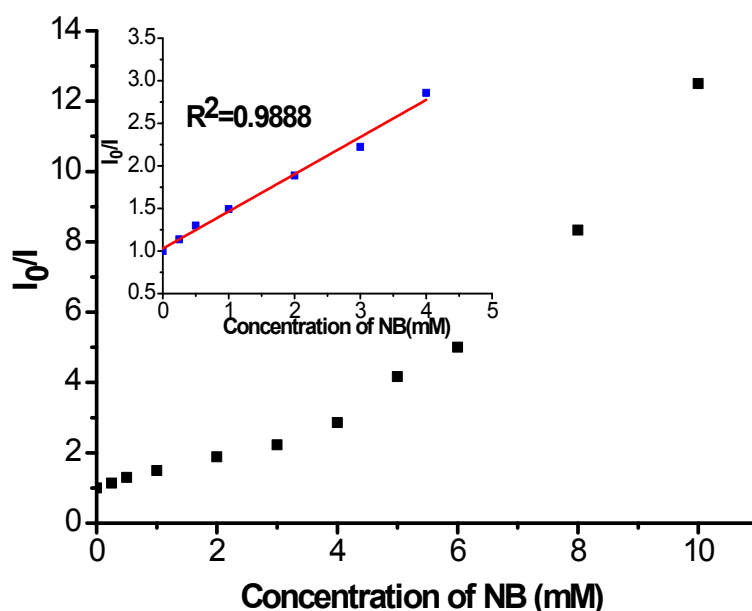

**Fig. S20** Stern-Volmer plot in response to NB. Inset shows the Stern-Volmer plot in the NB concentration range of 0~4.0 mM at room temperature.

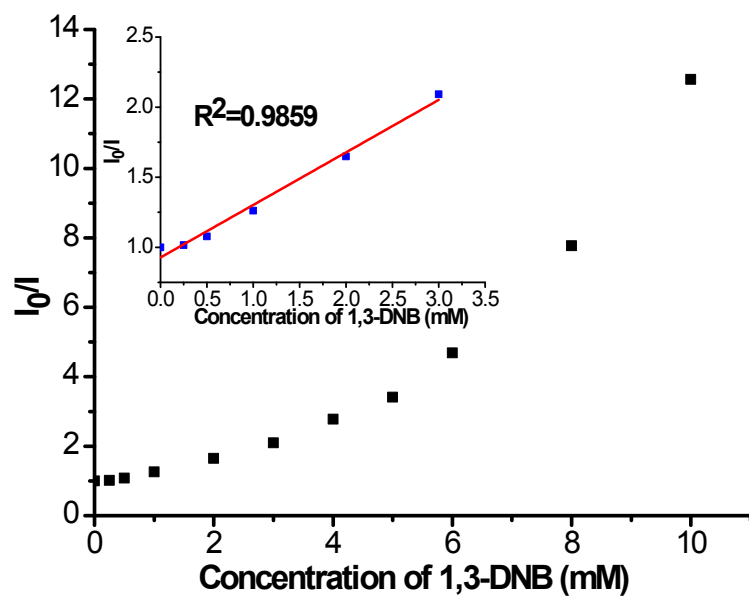

**Fig. S21** Stern-Volmer plot in response to 1,3-DNB. Inset shows the Stern-Volmer plot in the 1,3-DNB concentration range of 0~3.0 mM at room temperature.

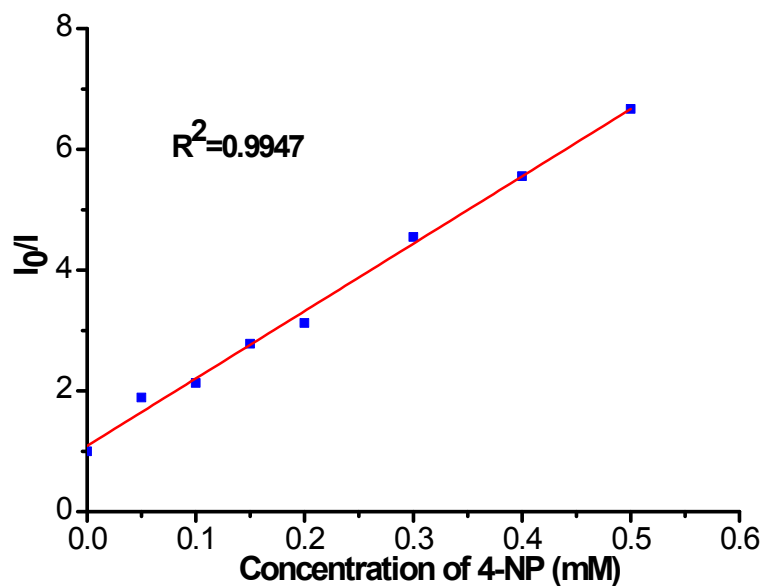

**Fig. S22** Stern-Volmer plot in the 4-NP concentration range of 0~0.5 mM at room temperature.

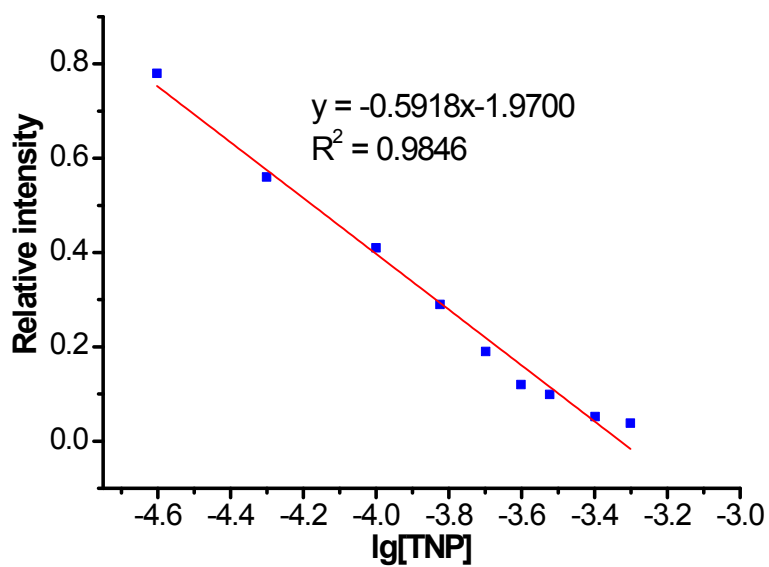

**Fig. S23** A linear relationship between  $I/I_0$  at 615 nm of Eu-TDC thin film and  $\lg[\text{TNP}]$ .

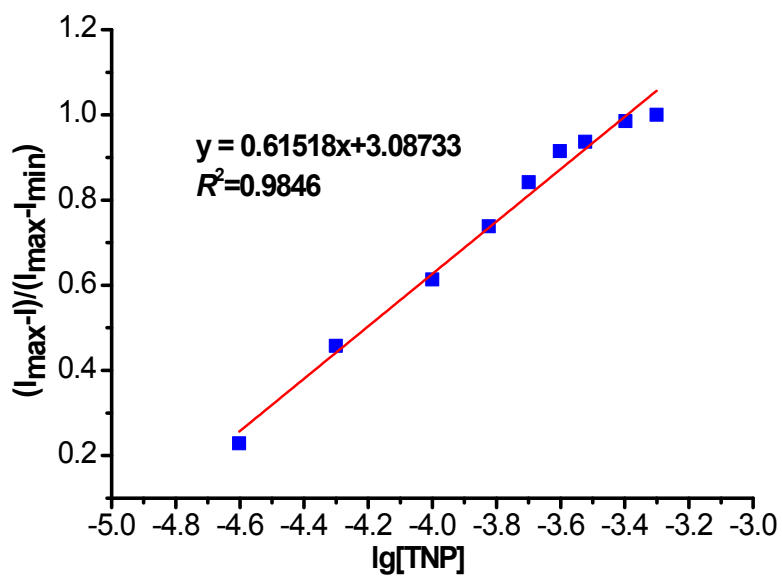

**Fig. S24** Luminescence response to changing TNP concentration.

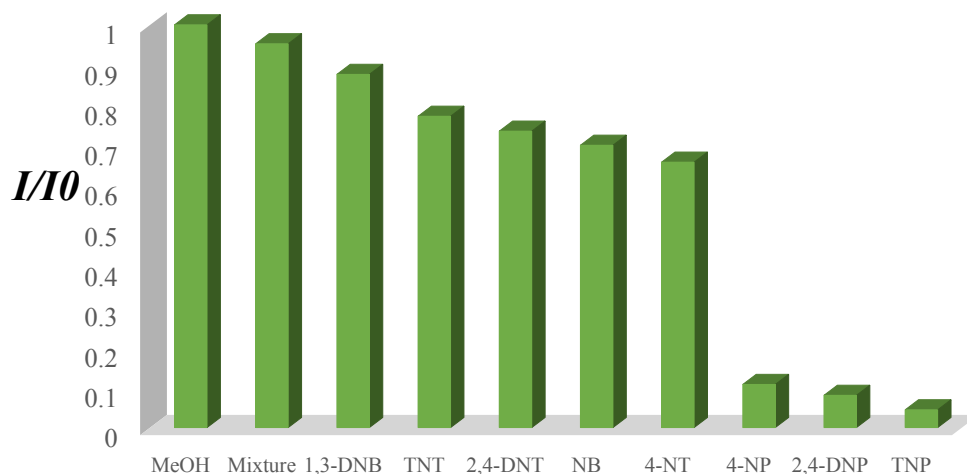

**Fig. S25** Luminescence relative intensity ( $I/I_0$ ) of the films immersed in the mixture solution that containing 0.5 mM different of NACs (the mixture is methanol solution containing 50 mM common solvent molecules, such as dichloromethane (DCM), *N,N*-dimethylformamide (DMF), tetrahydrofuran (THF), chloroform, acetonitrile, *m*-xylene, ethylbenzene, chlorobenzene and acetone).

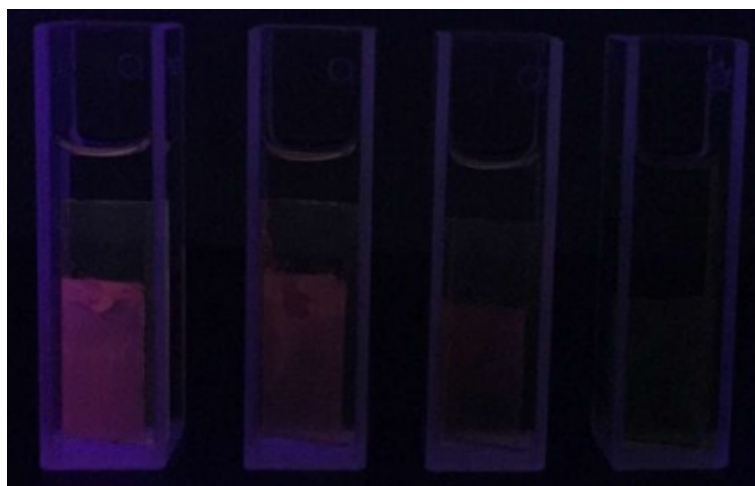

**Fig. S26** Photographs of Eu-TDC thin films under UV lamp excited at 254 nm in the presence of various TNP concentrations (0, 0.05, 0.15 and 0.3 mM).

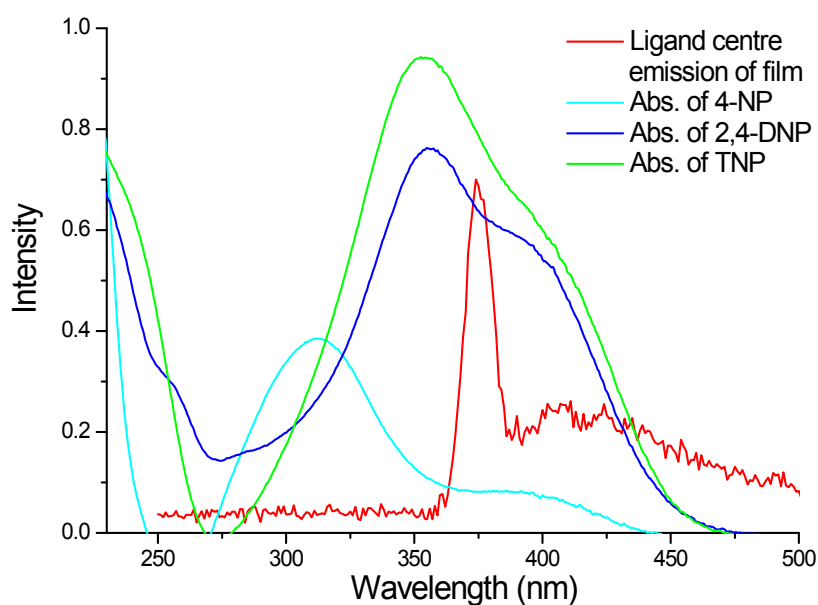

**Fig. S27** Absorption spectra of nitrophenols in methanol and ligand based emission spectra of Eu-TDC thin film. Note the overlap between the emission spectrum of the film and the absorption band of nitrophenols.

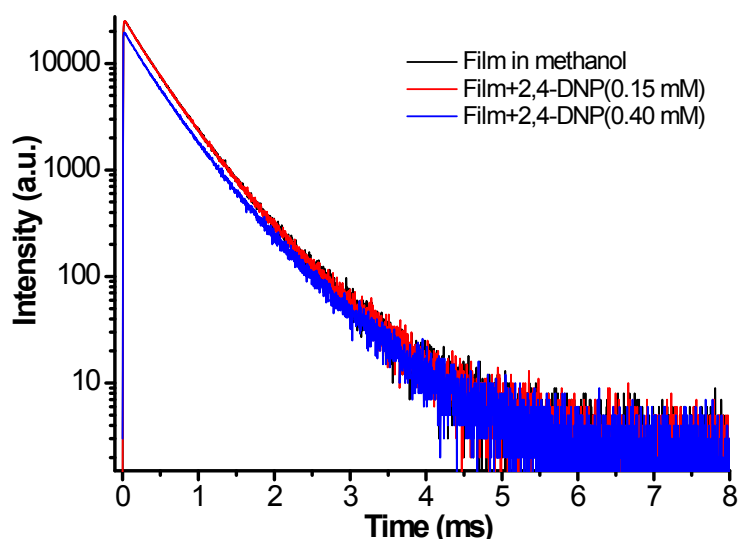

**Fig. S28** Luminescence decay curves of Eu-TDC thin film in the absence and presence of 2,4-DNP.

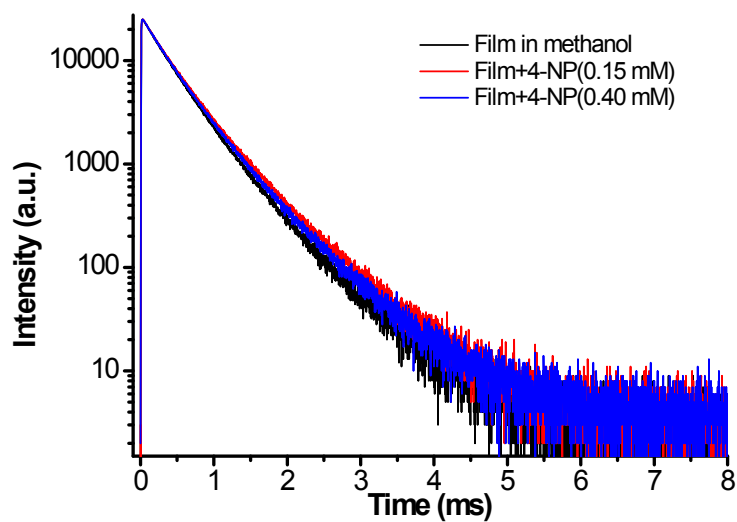

**Fig. S29** Luminescence decay curves of Eu-TDC thin film in the absence and presence of 4-NP.

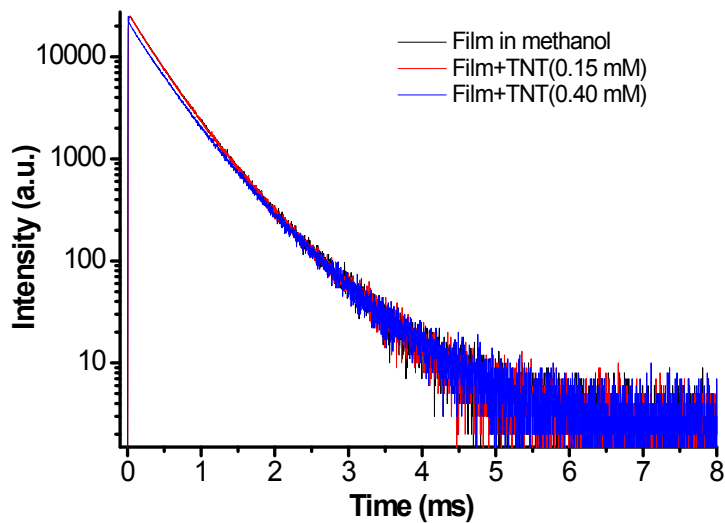

**Fig. S30** Luminescence decay curves of Eu-TDC thin film in the absence and presence of TNT.



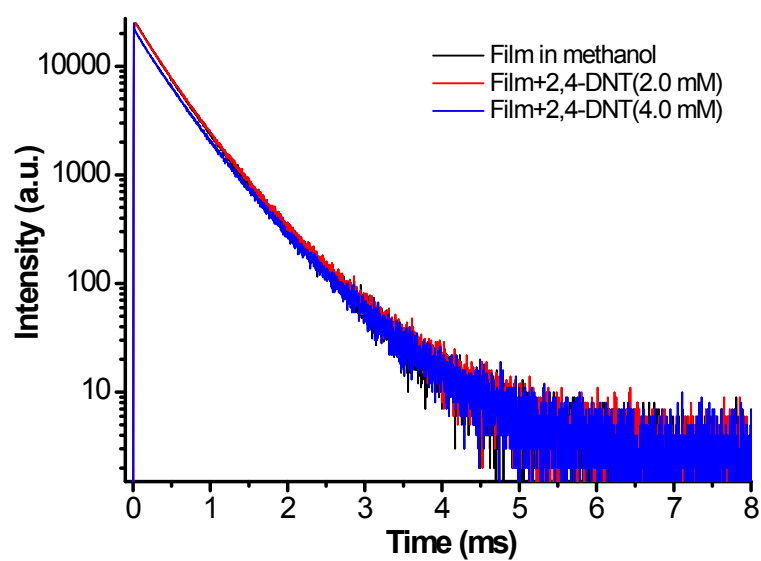

**Fig. S31** Luminescence decay curves of Eu-TDC thin film in the absence and presence of 2,4-DNT.

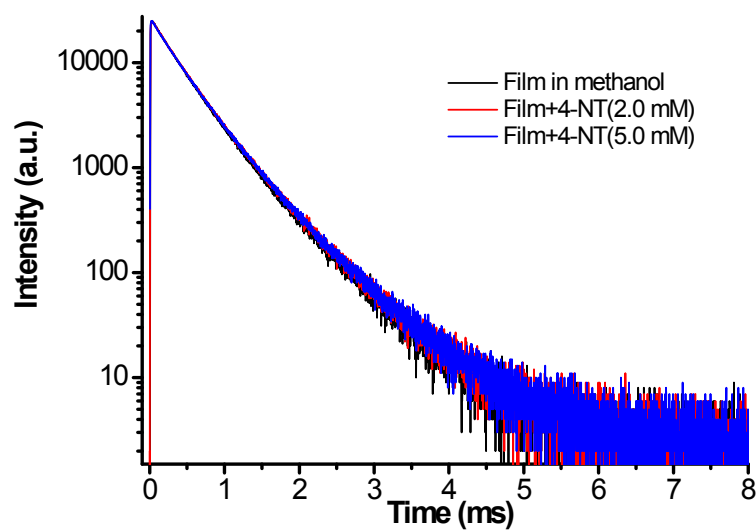

**Fig. S32** Luminescence decay curves of Eu-TDC thin film in the absence and presence of 4-NT.

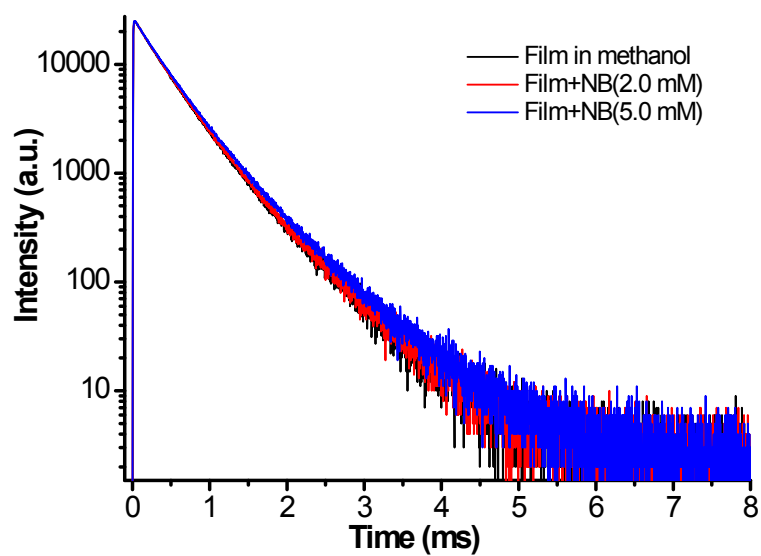

**Fig. S33** Luminescence decay curves of Eu-TDC thin film in the absence and presence of NB.

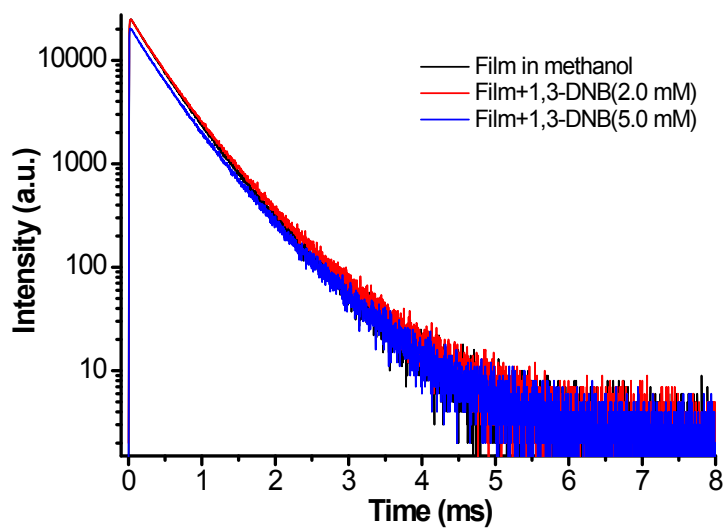

**Fig. S34** Luminescence decay curves of Eu-TDC thin film in the absence and presence of 1,3-DNB.

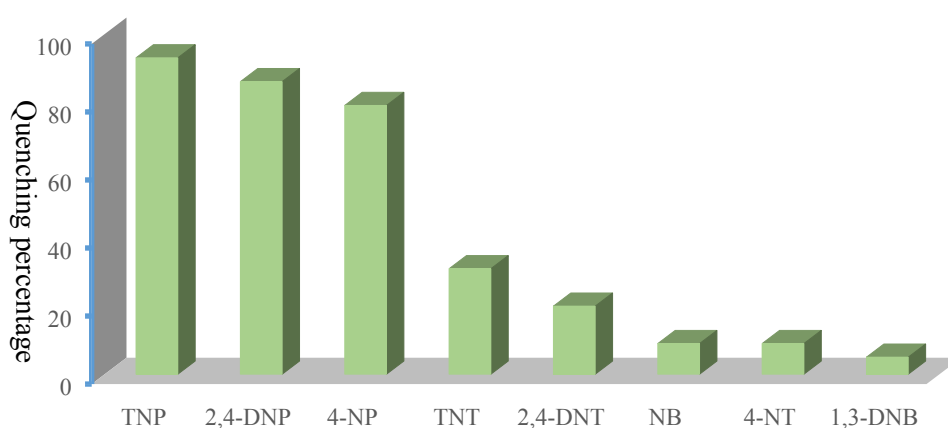

**Fig. S35** Fluorescence quenching percentage of the dispersed MOF solution toward 0.5 mM of different NACs

**Table S1** Luminescence lifetime parameters of the other tested NACs,  $\tau_1$ ,  $\tau_2$ ,  $A$ ,  $B_1$ ,  $B_2$  and average lifetime of  $\tau$ , goodness  $\chi^2$  of fits.

| Sample                   | $A$  | $B_1$    | $B_2$   | $\tau_1$ | $\tau_2$ | $\tau$ | $\chi^2$ |
|--------------------------|------|----------|---------|----------|----------|--------|----------|
| Film                     | 1.54 | 18164.20 | 4602.58 | 0.35     | 0.65     | 0.45   | 1.13     |
| Film + 2,4-DNP (0.15 mM) | 1.41 | 18773.18 | 4538.15 | 0.35     | 0.66     | 0.45   | 1.10     |
| Film + 2,4-DNP (0.40 mM) | 1.22 | 13355.56 | 3333.07 | 0.35     | 0.67     | 0.45   | 1.03     |
| Film + 4-NP (0.15 mM)    | 2.39 | 17581.98 | 5660.62 | 0.35     | 0.69     | 0.48   | 1.17     |
| Film + 4-NP (0.40 mM)    | 2.61 | 16301.30 | 4834.22 | 0.35     | 0.67     | 0.47   | 1.21     |
| Film + TNT (0.15 mM)     | 1.67 | 17356.23 | 4726.18 | 0.36     | 0.68     | 0.47   | 1.18     |
| Film + TNT (0.40 mM)     | 1.53 | 14996.69 | 3912.45 | 0.37     | 0.70     | 0.48   | 1.07     |
| Film + 2,4-DNT (2.00 mM) | 1.81 | 18813.69 | 4427.98 | 0.35     | 0.68     | 0.45   | 1.14     |
| Film + 2,4-DNT (5.00 mM) | 1.84 | 14670.90 | 3821.61 | 0.35     | 0.68     | 0.46   | 1.13     |
| Film + 4-NT (2.00 mM)    | 1.54 | 17925.15 | 4564.74 | 0.36     | 0.68     | 0.46   | 1.09     |
| Film + 4-NT (5.00 mM)    | 1.69 | 18349.40 | 4619.73 | 0.36     | 0.68     | 0.46   | 1.10     |
| Film + NB (2.00 mM)      | 1.51 | 17824.42 | 4080.54 | 0.36     | 0.68     | 0.46   | 1.10     |
| Film + NB (5.00 mM)      | 1.61 | 14750.94 | 4143.30 | 0.37     | 0.70     | 0.48   | 1.14     |
| Film + 1,3-DNB (2.00 mM) | 1.69 | 17203.60 | 4687.10 | 0.36     | 0.68     | 0.47   | 1.14     |
| Film + 1,3-DNB (5.00 mM) | 1.48 | 14517.62 | 3730.29 | 0.35     | 0.67     | 0.46   | 1.09     |

The budget of the Eu-TDC thin film:

Price list:

FTO glass: 154.2 \$ /m<sup>2</sup>

Thiophene-2,5-dicarboxylic acid: 1.2 \$ /g

Eu(NO<sub>3</sub>)<sub>3</sub>·6H<sub>2</sub>O: 2.3 \$ /g

Methanol: 10.0 \$ /L

NH<sub>4</sub>NO<sub>3</sub>: 0.05 \$ /g

The electrodeposition solution includes: 89.2 mg (0.2 mmol) Eu(NO<sub>3</sub>)<sub>3</sub>·6H<sub>2</sub>O, 34.4 mg (0.2 mmol) thiophene-2,5-dicarboxylic acid, 32 mg(0.4 mmol) NH<sub>4</sub>NO<sub>3</sub> (support electrolyte) and 20 mL methanol. We could prepare about 16 pieces of thin film from the 20 mL of electrodeposition solution. In addition, the size of Fluorine-doped Tin Oxide conductive glass is about 2.5 × 1.0 cm<sup>2</sup>. Therefore, the price of each piece of thin film was calculated to be 0.03 \$.
